# Supplementary material
Source: publisher figshare collection journal article supplement (https://sage.figshare.com/ndownloader/files/22849505)
Supplement: Supplementary file 1 [file 22849505]

Appendix B

Search Terms

**Punishment** (taken from Cooper, Heward, & Heron, 2007)

punish

Timeout

time-out

contingent observation

response cost

overcorrect

over-correct

positive practic*

massed practic*

restitution

contingent exercise

block*

reprimand

social disapproval

response interruption

**Disability**

delay*

disabilit*

disorder*

handicap*

impair*

retard*

at risk

at-risk

**Challenging Behavior (CB)**

challenging behavi*

negative behavi*

disruptive behavi*

noncompl*

problem behavi*

abberant behavi*

disobedien*

aggress*

defiant behavi*

off-task behavi*

self-injur* behavi*

stereotyp*

SIB

*indicates the wildcard function was used
